# Supplementary material for: High Efficacy and Drug Synergy of HDAC6-Selective Inhibitor NN-429 in Natural Killer (NK)/T-Cell Lymphoma
Source: MDPI journal article supplement (doi:10.3390/ph15111321), 2022-10-26

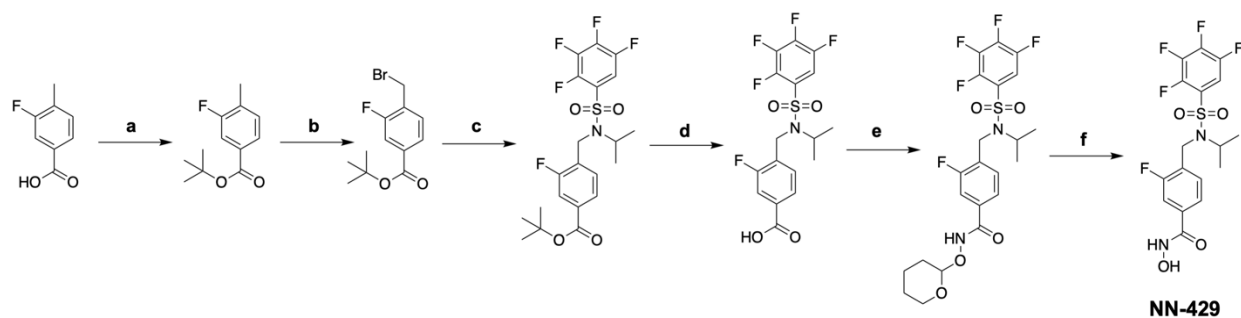

**Scheme S1.** Reagents and conditions to synthesize **NN-429**.

a) <sup>t</sup>BuOH, EDC, DMAP, THF, 18 h, RT; b) NBS, AIBN, CCl<sub>4</sub>, 4–6 h, 90°C; c) 2,3,4,5-tetrafluoro-*N*-isopropylbenzenesulfonamide, Cs<sub>2</sub>CO<sub>3</sub>, ACN, 6–18 h, RT; d) 4 M HCl/dioxane, 3–16 h, RT; e) (i) (COCl)<sub>2</sub>, THF, DMF, 1 h, 0°C; (ii) H<sub>2</sub>N-OTHP, <sup>i</sup>Pr<sub>2</sub>NEt, THF, 16 h, RT; f) 4 M HCl/dioxane, 3–16 h, RT.

**a**

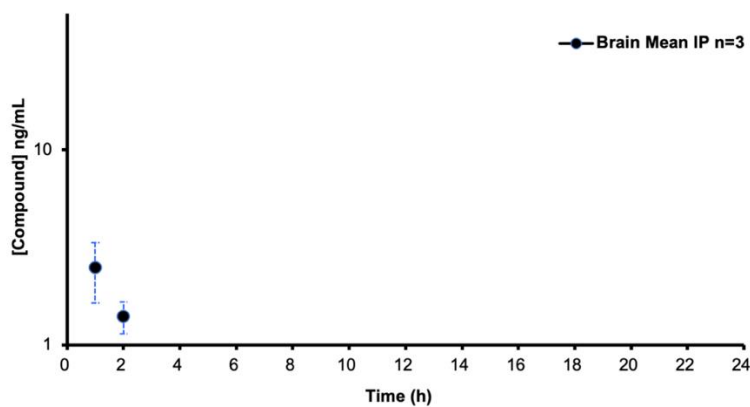

**b**

| Compound      | <i>t</i> <sub>1/2</sub> (h) | <i>C</i> <sub>max</sub> (ng/mL) | AUC <sub>last</sub> (h*ng/mL) | AUC <sub>inf</sub> (h*ng/mL) | AUC/D (h*mg/mL) |
|---------------|-----------------------------|---------------------------------|-------------------------------|------------------------------|-----------------|
| <b>NN-429</b> | NA                          | NA                              | NA                            | NA                           | NA              |

**Figure S1. *In vivo* brain PK analysis of NN-429.** **a.** *In vivo* PK profile of **NN-429** in the brain of male CD-1 mice (n=3) via IP (50 mg/kg). **b.** Mean PK parameters of **NN-429** in the brain of male CD-1 mice (n=3) via IP (50 mg/kg).

**Table S1.** Cellular cytotoxicity of **NN-429**, **NN-390**, **KT-531** and citarinostat in PTCL malignancies.

Heatmap of IC<sub>50</sub> values (μM) calculated from drug response analysis of **NN-429**, **NN-390**, **KT-531** and citarinostat from one representative out of 3 independent experiments. Cell lines are classified according to the respective disease subtype. Abbreviations: ANKL, aggressive NK-leukemia; T/NK, T-cell/Natural killer cell; γδ T-NHL, γδ T-cell non-Hodgkin's lymphoma; ALK- ALCL, anaplastic large cell lymphoma (anaplastic lymphoma kinase negative); CTCL, cutaneous T-cell lymphoma.

| Compound            | Mature TCL |                    |          |           |       |
|---------------------|------------|--------------------|----------|-----------|-------|
|                     | ANKL       | T/NK cell lymphoma | γδ T-NHL | ALK- ALCL | CTCL  |
|                     | KHYG-1     | SNK6               | DERL-2   | Mac2a     | Myla  |
| <b>NN-429</b>       | 7.25       | 12.04              | 2.32     | 15.07     | >50   |
| <b>NN-390</b>       | 3.63       | 3.1                | 1.03     | 7.62      | 20.23 |
| <b>KT-531</b>       | 3.39       | 3.53               | 0.46     | 2.8       | 16.17 |
| <b>Citarinostat</b> | 1.2        | 2.5                | 1.5      | 4.66      | 3.77  |

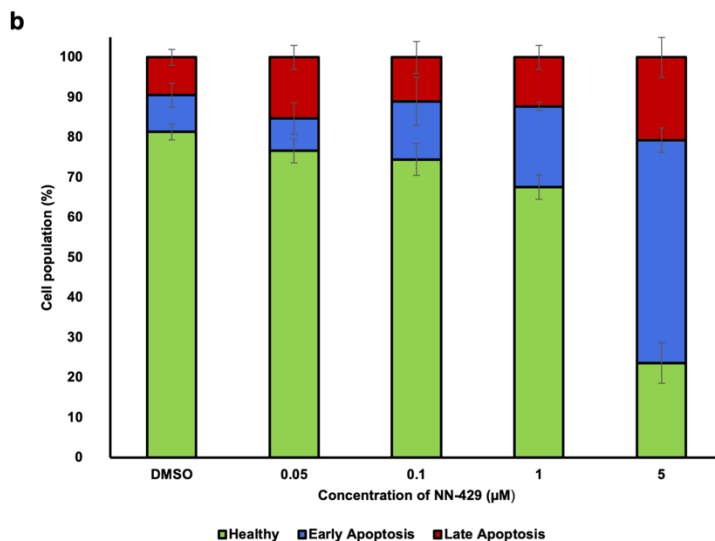

**Figure S2.** Percentage of DERL-2 cell populations in healthy, early apoptosis, and late apoptosis phases following treatment with **NN-429** for 18 h at the indicated concentrations.

|         | NN-429 – Doxorubicin      |                             | NN-429 – Cytarabine       |                             | NN-429 – Etoposide        |                             | NN-429 – SNS-032          |                             |
|---------|---------------------------|-----------------------------|---------------------------|-----------------------------|---------------------------|-----------------------------|---------------------------|-----------------------------|
|         | Overall ZIP Synergy Score | Most Synergistic Area Score | Overall ZIP Synergy Score | Most Synergistic Area Score | Overall ZIP Synergy Score | Most Synergistic Area Score | Overall ZIP Synergy Score | Most Synergistic Area Score |
| Run 1   | 3.51                      | 12.11                       | 6.99                      | 14.89                       | 7.59                      | 13.97                       | 2.02                      | 5.93                        |
| Run 2   | 1.18                      | 9.78                        | 5.44                      | 8.94                        | 6.41                      | 11.01                       | 1.19                      | 5.73                        |
| Run 3   | 0.90                      | 10.31                       | 3.72                      | 7.15                        | 6.00                      | 12.38                       | 1.61                      | 6.17                        |
| Run 4   | 0.87                      | 6.28                        | 2.13                      | 5.54                        | 5.63                      | 12.91                       | 4.75                      | 11.11                       |
| Average | 1.61                      | 9.62                        | 4.57                      | 9.13                        | 6.41                      | 12.57                       | 2.39                      | 7.23                        |

**Figure S3.** Table of overall ZIP synergy score and most synergistic area (MSA) score for four separate runs of the combinations NN-429 + doxorubicin (dox), NN-429 + cytarabine (cyt), NN-429 + etoposide (eto), and NN-429 + SNS-032 in YT cells.

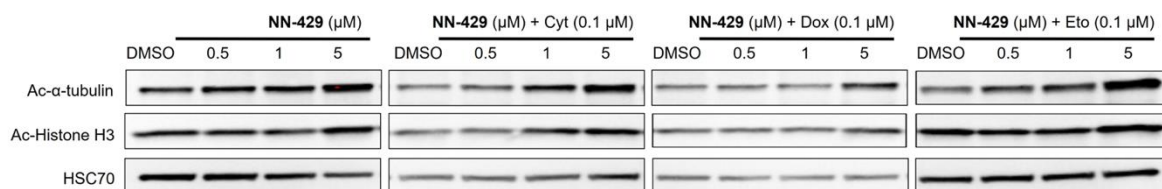

**Figure S4.** Western blot illustrating  $\alpha$ -tubulin acetylation and histone H3 acetylation levels in DERL-7 cells following 24 h treatment with varying concentrations of NN-429, NN-429 + 0.1  $\mu$ M cytarabine (cyt), NN-429 + 0.1  $\mu$ M doxorubicin (dox), NN-429 + 0.1  $\mu$ M etoposide (eto). Protein extracts were prepared, resolved by SDS-PAGE and immunoblotted with acetylated  $\alpha$ -tubulin, acetylated Histone H3 and HSC70 antibodies were used for loading controls. A representative Western blot of three independent experiments is shown.

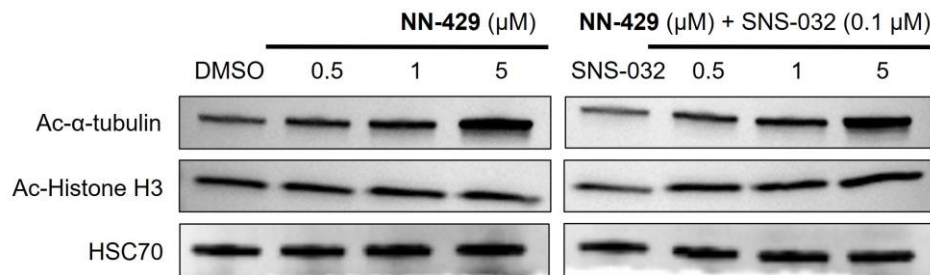

**Figure S5.** Western blot illustrating  $\alpha$ -tubulin acetylation and Histone H3 acetylation levels in YT cells following 24 h treatment with varying concentrations of NN-429, NN-429 + 0.1  $\mu$ M SNS-032. Protein extracts

were prepared, resolved by SDS-PAGE and immunoblotted with acetylated  $\alpha$ -tubulin, acetylated Histone H3 and HSC70 antibodies.

Plate 1  
1/2  
Inhibitor 1 Dilution

|   | PBS | Medium | Start C. | 1/2 | 1/2 | 1/2  | 1/2   | 1/2    | 1/2     | Inhibitor 2 | Bortezomib | PBS |
|---|-----|--------|----------|-----|-----|------|-------|--------|---------|-------------|------------|-----|
|   | 1   | 2      | 3        | 4   | 5   | 6    | 7     | 8      | 9       | 10          | 11         | 12  |
| A |     | Medium | 10       | 5   | 2.5 | 1.25 | 0.625 | 0.3125 | 0.15625 | 0           |            |     |
| B |     | Medium | 10       | 5   | 2.5 | 1.25 | 0.625 | 0.3125 | 0.15625 | 0           |            |     |
| C |     | Medium | 10       | 5   | 2.5 | 1.25 | 0.625 | 0.3125 | 0.15625 | 0           |            |     |
| D |     | Medium | 10       | 5   | 2.5 | 1.25 | 0.625 | 0.3125 | 0.15625 | 0           |            |     |
| E |     | Medium | 10       | 5   | 2.5 | 1.25 | 0.625 | 0.3125 | 0.15625 | 0           |            |     |
| F |     | Medium | 10       | 5   | 2.5 | 1.25 | 0.625 | 0.3125 | 0.15625 | 0           |            |     |
| G |     | Medium | 10       | 5   | 2.5 | 1.25 | 0.625 | 0.3125 | 0.15625 | 0           |            |     |
| H |     | Medium | 10       | 5   | 2.5 | 1.25 | 0.625 | 0.3125 | 0.15625 | 0           |            |     |

  

Plate 2  
1/5  
Inhibitor 2 Dilution

|   | 1 | 2 | 3       | 4       | 5       | 6       | 7       | 8       | 9       | 10      | 11 | 12          |
|---|---|---|---------|---------|---------|---------|---------|---------|---------|---------|----|-------------|
| A |   |   | 10      | 10      | 10      | 10      | 10      | 10      | 10      | 10      |    | Start C.    |
| B |   |   | 2       | 2       | 2       | 2       | 2       | 2       | 2       | 2       |    | 1/5         |
| C |   |   | 0.4     | 0.4     | 0.4     | 0.4     | 0.4     | 0.4     | 0.4     | 0.4     |    | 1/5         |
| D |   |   | 0.08    | 0.08    | 0.08    | 0.08    | 0.08    | 0.08    | 0.08    | 0.08    |    | 1/5         |
| E |   |   | 0.016   | 0.016   | 0.016   | 0.016   | 0.016   | 0.016   | 0.016   | 0.016   |    | 1/5         |
| F |   |   | 0.0032  | 0.0032  | 0.0032  | 0.0032  | 0.0032  | 0.0032  | 0.0032  | 0.0032  |    | 1/5         |
| G |   |   | 0.00064 | 0.00064 | 0.00064 | 0.00064 | 0.00064 | 0.00064 | 0.00064 | 0.00064 |    | 1/5         |
| H |   |   | 0       | 0       | 0       | 0       | 0       | 0       | 0       | 0       |    | Inhibitor 1 |

**Figure S6.** Plate set-up for synergy studies.

## Synthetic Procedures

### a) *Tert*-butyl ester protection:

The appropriate benzoic acid was dissolved in THF:*Tert*-butyl alcohol (1:1) mixture (0.1 M in total). 1-Ethyl-3-(3-dimethylaminopropyl)carbodiimide (EDC, 2 equiv.) and 4-Dimethylaminopyridine (DMAP, 2 equiv.) were added and the reactive mixture was stirred for 18 h at RT. The reaction mixture was then diluted in EtOAc and 0.1 M HCl. The organic layer was washed with 0.1 M HCl (1 $\times$ ), water (3 $\times$ ) and brine (1 $\times$ ) and the aqueous layer was extracted once with EtOAc. The combined organic layer was dried over MgSO<sub>4</sub>, filtered and purified by column chromatography to isolate the target compound.

### b) Benzylic bromination:

*N*-Bromosuccinimide (2.0 equiv.), 2,2'-azobis(2-methylpropionitrile) (AIBN) (0.05 equiv.) and the appropriate *tert*-butyl protected carboxylic acid (1.0 equiv.) were refluxed in CCl<sub>4</sub> for 10–24 h. The brown mixture was returned to RT and filtered at atmospheric pressure, washed with CCl<sub>4</sub> (2  $\times$  5 mL) and concentrated *in vacuo* to give a brown oil. Column chromatography isolated the purified product.

c) S<sub>N</sub>2 substitution with benzyl bromides:

Benzyl bromide (1.1 equiv.) was added to a solution of the amine (1 equiv.) and Cs<sub>2</sub>CO<sub>3</sub> (2 equiv.) in ACN (0.1 M). After 6–18 h, the reaction mixture was diluted in EtOAc and saturated aqueous sodium bicarbonate. The organic layer was washed with saturated aqueous sodium bicarbonate (1×), water (3×) and brine (1×) and the aqueous layer was extracted with EtOAc. The combined organic layer was dried over MgSO<sub>4</sub>, filtered, concentrated *in vacuo* and purified by column chromatography to isolate the target compound.

d) Acid-mediated hydrolysis of carboxylate esters:

The carboxylate or hydroxamate ester was charged in a round-bottom flask with 4 M HCl in dioxane (0.3 M final concentration) at RT in air. After 3–16 h, the solvent was removed *in vacuo*. Carboxylic acid intermediates were used in the next step without further purification.

e) Formation of hydroxamate esters:

Oxalyl chloride (4 equiv.) was added dropwise to a solution of the appropriate carboxylic acid (1.0 equiv.) in THF (0.05–0.2 M) and DMF (1 to 2 drops) at 0°C and stirred for 1–3 h. The reaction was concentrated *in vacuo* before re-dissolving in dry THF (0.2 M) and mixing with diisopropylethylamine or triethylamine (2.0 equiv.) followed by *O*-protected hydroxylamine (1.5 equiv.). After 16 h, the reaction was quenched with 1 M HCl and the layers were separated. The organic layer was washed with 1 M HCl and the combined aqueous layer was extracted with EtOAc or CH<sub>2</sub>Cl<sub>2</sub>. The organic layer was dried (MgSO<sub>4</sub>), filtered and concentrated *in vacuo*, and column chromatography isolated the target compound.

f) Acid-mediated hydrolysis of hydroxamate esters:

The carboxylate or hydroxamate ester was charged in a round-bottom flask with 4 M HCl in dioxane (0.3 M final concentration) at RT in air. After 3–16 h, the solvent was removed *in vacuo*. Final hydroxamic acids were purified using preparative HPLC.

### Characterization of novel intermediate molecules

3-fluoro-4-(((2,3,4,5-tetrafluoro-*N*-isopropylphenyl)sulfonamido)methyl)-*N*-((tetrahydro-2*H*-pyran-2-yl)oxy)benzamide

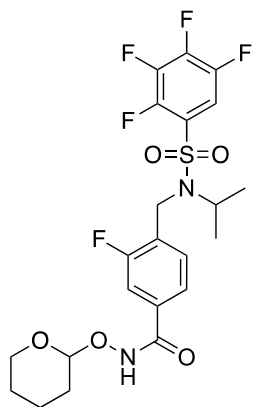

The product was obtained using synthetic procedure (e) as a light yellow oil (67%).  $^1\text{H}$  NMR (400 MHz,  $\text{CD}_3\text{CN}$ )  $\delta$  10.23 (s, 1H), 7.95 – 7.34 (m, 4H), 5.06 – 5.11 (m, 1H), 4.58 (s, 2H), 4.15 – 4.12 (m, 3H), 2.03 – 1.50 (m, 6H), 1.06 (d,  $J$  = 6.8 Hz, 6H).  $^{13}\text{C}$  NMR (101 MHz,  $\text{CD}_3\text{CN}$ )  $\delta$  170.7, 163.6, 139.9, 133.7, 130.5, 129.1, 125.7, 125.2, 123.2, 114.07, 112.64, 112.39, 63.3, 60.0, 50.4, 39.1, 39.3, 20.7, 18.3.  $^{19}\text{F}$  NMR (376 MHz,  $\text{CD}_3\text{CN}$ )  $\delta$  -118.17 – -118.73 (m, 1F), -135.57 – -136.53 (m, 1F), -138.05 – -138.73 (m, 1F), -149.09 – -150.02 (m, 1F), -153.42 – -153.78 (m, 1F). LRMS (ESI<sup>+</sup>): mass not observed.

*tert*-butyl 3-fluoro-4-(((2,3,4,5-tetrafluoro-*N*-isopropylphenyl)sulfonamido)methyl)benzoate

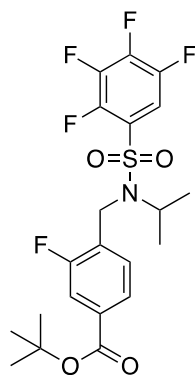

The product was obtained using synthetic procedure (c) as a white solid (54%).  $^1\text{H}$  NMR (400 MHz,  $\text{CDCl}_3$ )  $\delta$  7.76 – 7.72 (m, 1H), 7.63 – 7.60 (m, 1H), 7.56 – 7.53 (m, 1H), 7.51 – 7.41 (m, 1H), 4.58 (s, 2H), 4.22 (p,  $J$  = 6.8 Hz, 1H), 1.59 (s, 9H), 1.30 – 0.96 (m, 6H).  $^{19}\text{F}$  NMR (376 MHz,  $\text{CDCl}_3$ )  $\delta$  -118.50 – -119.03 (s, 1F), -134.03 – -134.93 (m, 1F), -135.92 – -136.44 (m, 1F), -146.82 – -148.53 (m, 1F), -151.44 – -151.97 (m, 1F).  $^{13}\text{C}$  NMR (101 MHz,  $\text{CDCl}_3$ )  $\delta$  164.1, 164.1, 145.1, 144.5, 143.1, 141.2, 140.0, 139.8, 139.2, 133.7, 116.09, 115.5, 112.2, 81.6, 50.4, 39.1, 28.1, 20.9. LRMS (ESI<sup>+</sup>): mass not observed.

*tert*-butyl 4-(bromomethyl)-3-fluorobenzoate

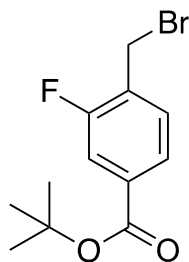

The product was obtained using synthetic procedure (b) as a brown oil (40%).  $^1\text{H}$  NMR (400 MHz,  $\text{CD}_3\text{CN}$ )  $\delta$  7.64 – 7.62 (m, 1H), 7.56 – 7.51 (m, 1H), 7.26 (m, 1H), 4.58 (d,  $J$  = 1.0 Hz, 2H), 1.58 (s, 9H).  $^{13}\text{C}$  NMR (101 MHz,  $\text{CD}_3\text{CN}$ )  $\delta$  164.3, 159.9, 131.1, 131.4, 129.8, 124.8, 80.3, 27.4, 20.8.  $^{19}\text{F}$  NMR (376 MHz,  $\text{CD}_3\text{CN}$ )  $\delta$  -111.81 – -122.48 (m, 1F). LRMS ( $\text{ESI}^+$ ): mass not observed.

*tert*-butyl 3-fluoro-4-methylbenzoate

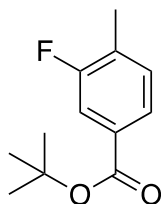

The product was obtained using synthetic procedure (a) as a clear oil (67%).  $^1\text{H}$  NMR (400 MHz,  $\text{CD}_3\text{CN}$ )  $\delta$  7.64 – 7.62 (m, 1H), 7.55 (d,  $J$  = 10.5, 1H), 7.25 – 7.22 (m, 1H), 2.29 (s, 3H), 1.58 (s, 9H).  $^{19}\text{F}$  NMR (376 MHz,  $\text{CD}_3\text{CN}$ )  $\delta$  -105.05 – -130.54 (m, 1F).  $^{13}\text{C}$  NMR (101 MHz,  $\text{CD}_3\text{CN}$ )  $\delta$  164.3, 159.7, 131.4, 124.9, 124.0, 117.0, 115.3, 80.3, 22.3, 20.6. LRMS ( $\text{ESI}^+$ ): mass not observed.

## Characterization of final compound

### NN-429

3-fluoro-*N*-hydroxy-4-(((2,3,4,5-tetrafluoro-*N*-isopropylphenyl)sulfonamido)methyl)benzamide

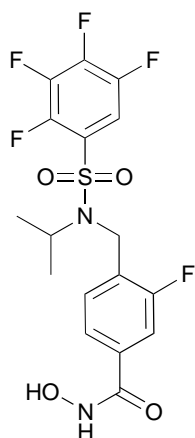

The product was made using synthetic procedure (f), followed by preparative HPLC and lyophilization to obtain a white powder (39%).  $^1\text{H}$  NMR (400 MHz, Acetone)  $\delta$  10.85 (s, 1H), 7.88 – 7.40 (m, 4H), 4.64 (s, 2H), 4.47 – 4.18 (m, 1H), 1.10 (dd,  $J$  = 6.8, 3.0 Hz, 6H), *Hydroxamic acid OH proton was not observed*.  $^{19}\text{F}$  NMR (376 MHz, MeOD)  $\delta$  -118.98 – -119.12 (m, 1F), -136.34 – -137.10 (m, 1F), -138.56 – -139.80 (m, 1F), -150.04 – -151.11 (m, 1F), -154.73 (d,  $J$  = 19.7 Hz, 1F).  $^{13}\text{C}$  NMR (126 MHz, acetone)  $\delta$  161.8, 160.6, 149.0, 146.1, 144.1, 143.2, 132.1, 131.6, 131.5, 126.4, 123.7, 122.6, 113.5, 112.8, 51.4, 40.5, 22.7. HRMS (ESI<sup>+</sup>)  $m/z$  calcd for  $[\text{C}_{17}\text{H}_{16}\text{F}_5\text{N}_2\text{O}_4\text{S}]^+$ : 439.0745, found: 439.0710. HPLC (I)  $t_R$  = 34.42 min; HPLC (II)  $t_R$  = 36.77 min (99%).

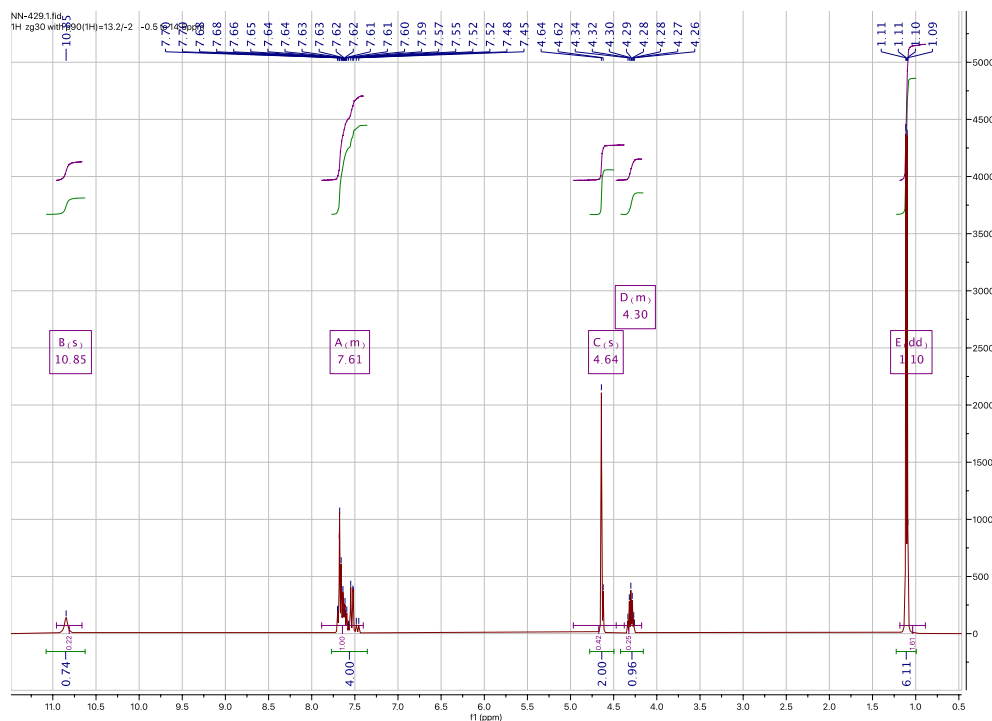

Supplement: s1 [file s1]
